# Supplementary material for: Selenium Nanoparticles Based on Morinda officinalis Polysaccharides: Characterization, Anti-Cancer Activities, and Immune-Enhancing Activities Evaluation In Vitro
Source: MDPI journal article supplement (doi:10.3390/molecules28062426), 2023-03-07
Supplement: s1 [file s1]

**Table S1.** RT-PCR primer sequences.

|                  |                        |
|------------------|------------------------|
| IL-2 F           | GTGCTCCTTGTC AACAGCG   |
| IL-2 R           | GGGGAGTTTCAGGTTCTGTA   |
| IL-4 F           | ATCATCGGCATTTGAACGAGG  |
| IL-4 R           | TGCAGCTCCATGAGAACTA    |
| IFN- $\gamma$ F  | ATGAACGCTACACACTGCATC  |
| IFN- $\gamma$ R  | CCATCCTTTTGCCAGTTCCTC  |
| $\beta$ -actin F | GTGACGTTGACATCCGTAAAGA |
| $\beta$ -actin R | GCCGGACTCATCGTACTCC    |

# 1 Results

|                                | Size (d.n...         | % Intensity: | St Dev (d.n... |
|--------------------------------|----------------------|--------------|----------------|
| <b>Z-Average (d.nm):</b> 66.21 | <b>Peak 1:</b> 75.68 | 100.0        | 28.08          |
| <b>Pdl:</b> 0.117              | <b>Peak 2:</b> 0.000 | 0.0          | 0.000          |
| <b>Intercept:</b> 0.935        | <b>Peak 3:</b> 0.000 | 0.0          | 0.000          |
| <b>Result quality</b> Good     |                      |              |                |

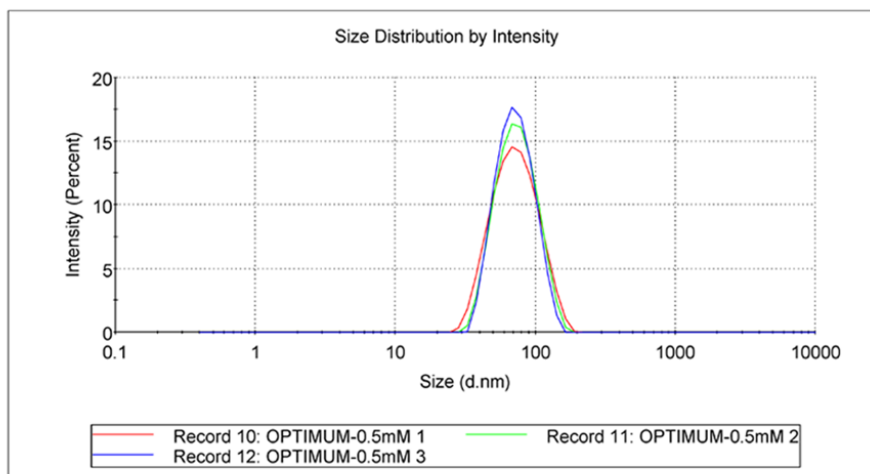

# 2 Results

|                                | Size (d.n...         | % Intensity: | St Dev (d.n... |
|--------------------------------|----------------------|--------------|----------------|
| <b>Z-Average (d.nm):</b> 159.4 | <b>Peak 1:</b> 200.8 | 100.0        | 74.53          |
| <b>Pdl:</b> 0.259              | <b>Peak 2:</b> 0.000 | 0.0          | 0.000          |
| <b>Intercept:</b> 0.736        | <b>Peak 3:</b> 0.000 | 0.0          | 0.000          |
| <b>Result quality</b> Good     |                      |              |                |

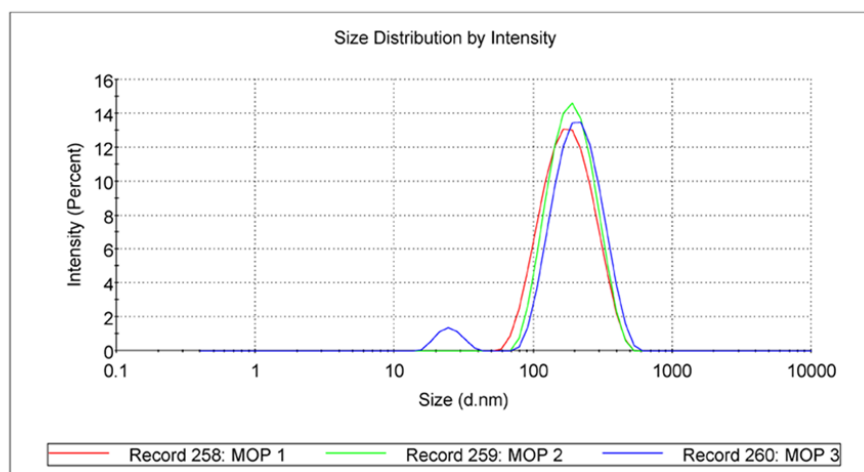

**Figure S1.** Size distribution report by intensity of Se-MOP (1) and MOP (2).
